# Supplementary material for: Recurrence of positive SARS-CoV-2 viral RNA in recovered COVID-19 patients during medical isolation observation
Source: PubMed Central journal article supplement (PMC7368008; doi:10.1038/s41598-020-68782-w), 2020-07-17
Supplement: 41598_2020_68782_MOESM1_ESM.pdf [file 41598_2020_68782_MOESM1_ESM.pdf]

## **Recurrence of Positive SARS-CoV-2 Viral RNA in Recovered COVID-19 Patients During Medical Isolation Observation**

Recurrence of Positive SARS-CoV-2 Viral RNA in Recovered COVID-19 Patients During Medical Isolation Observation

Bo Yuan<sup>1#</sup>, Han-Qing Liu<sup>1#</sup>, Zheng-Rong Yang<sup>2</sup>, Yong-Xin Chen<sup>1</sup>, Zhi-Yong Liu<sup>1</sup>, Kai Zhang<sup>1</sup>, Cheng Wang<sup>1</sup>, Wei-Xin Li<sup>1</sup>, Ya-Wen An<sup>1</sup>, Jian-Chun Wang<sup>1\*</sup>, Shuo Song<sup>1\*</sup>

Author affiliations: Science and Education department, Shenzhen Samii Medical Center (B. Yuan, H. Liu, J. Wang, Y. Chen, Y. An, C. Wang, W. Li, S. Song) ; HIV/AIDS Control and Prevention Division, Shenzhen Center for Disease Control and Prevention (Z. Yang)

# These authors contributed equally to this work.

\* Correspondence to Shuo Song and Jian-Chun Wang, 1 Jinniu West Road, Pingshan district, Shenzhen, Guangdong province, China. Email: [songshuo@ssmc-sz.com](mailto:songshuo@ssmc-sz.com); [wangjianchun@ssmc-sz.com](mailto:wangjianchun@ssmc-sz.com).

Figure S1. The comparison of antibody levels against SARS-CoV-2 among 133 none re-positive recovered COVID-19 patients and 14 re-positives. The average S/CO value of total Ab, IgA, IgG and IgM were compared between re-positives (green) and none re-positives (red). Black dot shown a positive result ( $S/CO \geq 1$ ), and red dot shown a negative result ( $S/CO < 1$ ). A two tailed independent sample t-test was used to show the significant difference between the two groups.

Group  none re-positivate  re-positivate

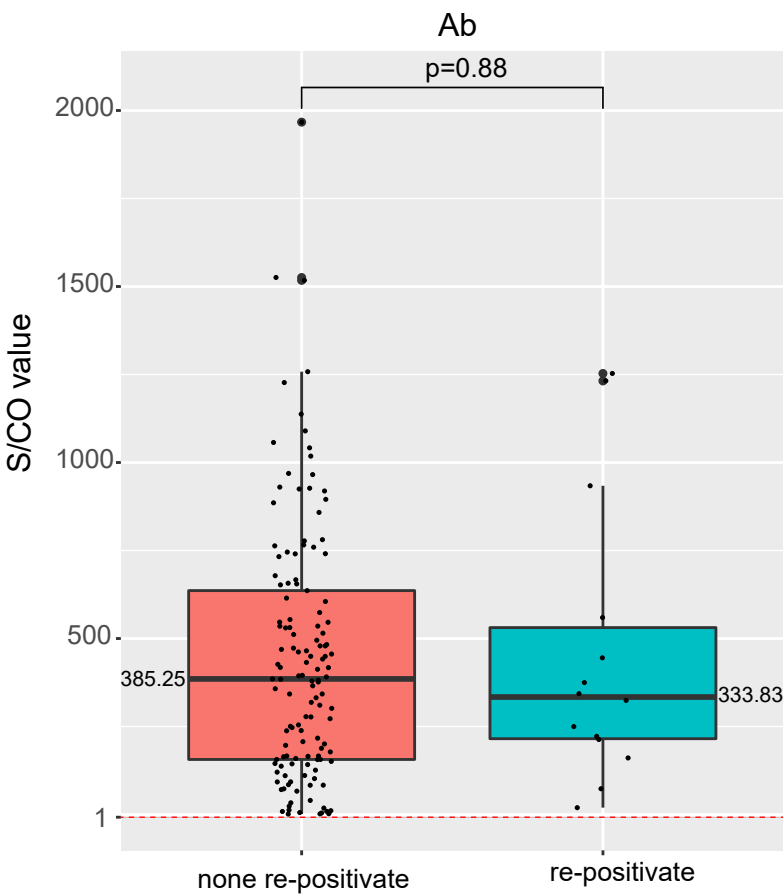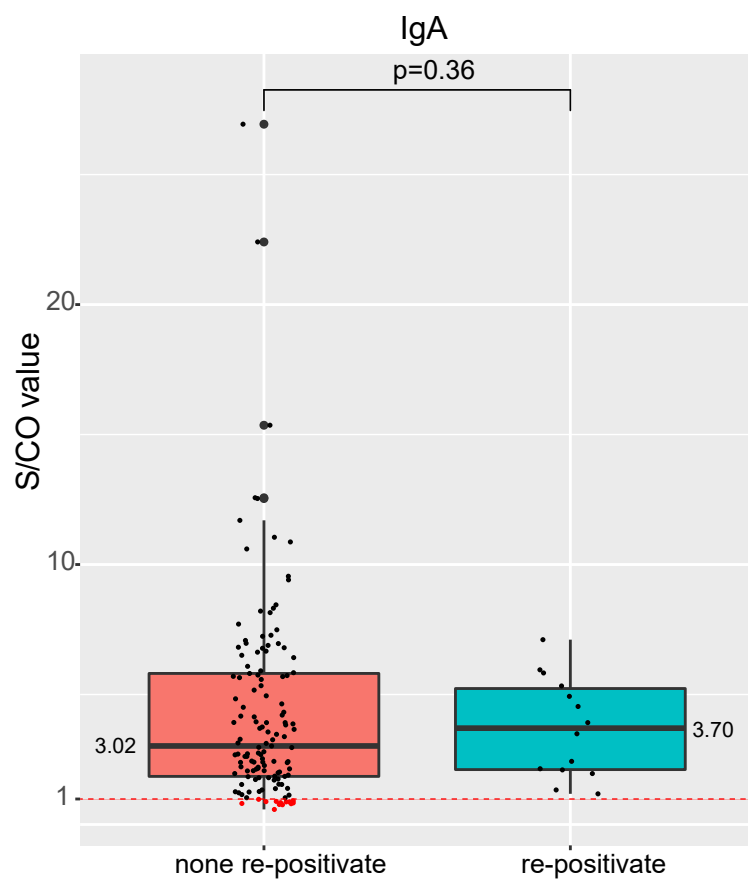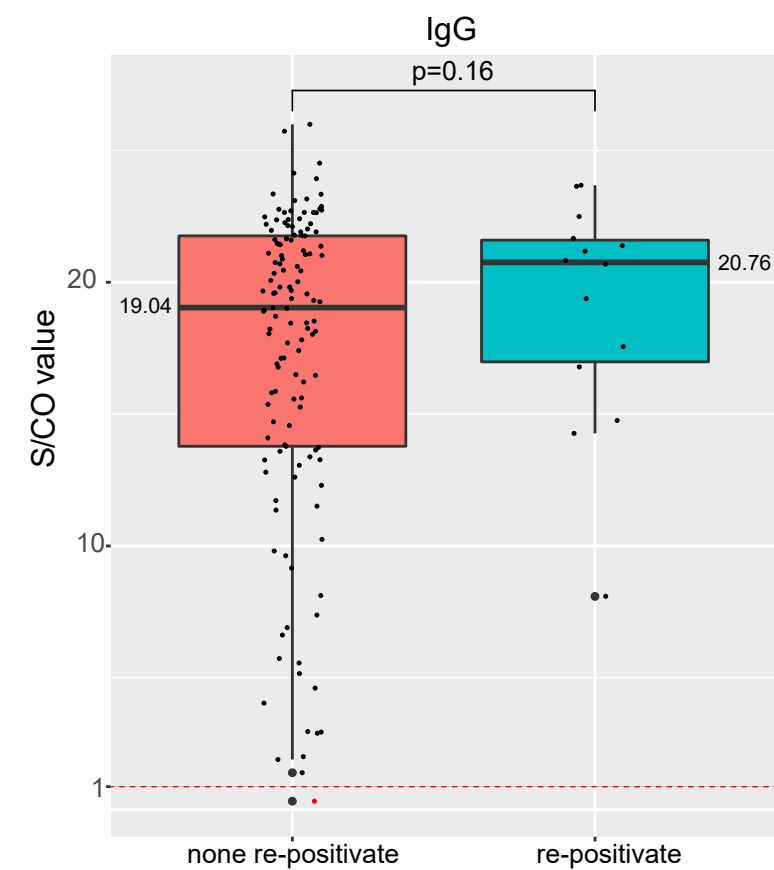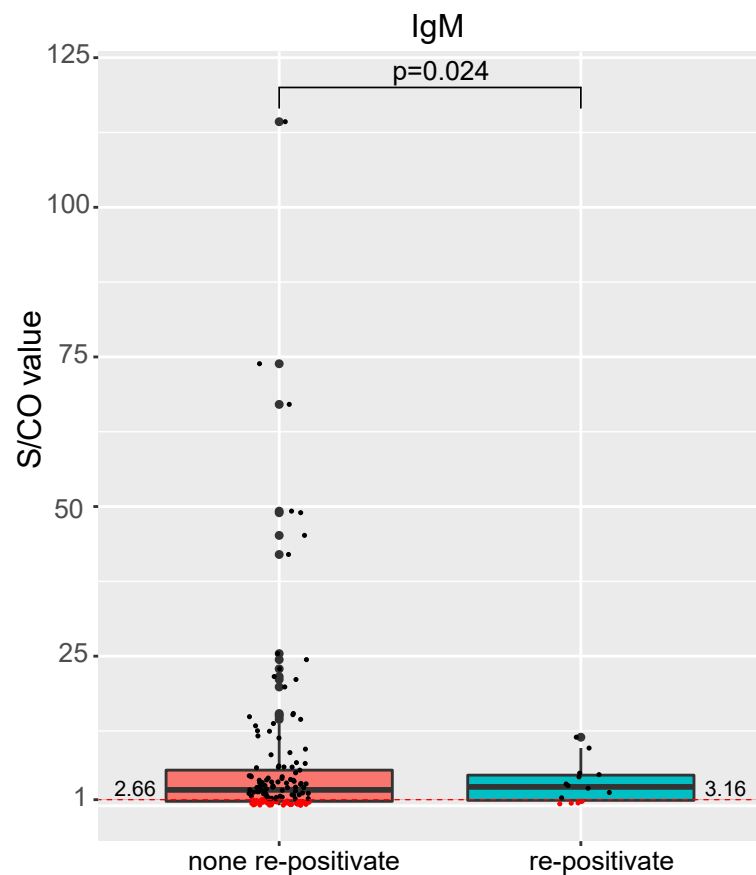

Table S1 Ct Value of 19 re-positive cases of SARS-CoV-2 Viral RNA RT-PCR test

|          | swab                | Ct value     |             | Ct value (re-test) |             |
|----------|---------------------|--------------|-------------|--------------------|-------------|
|          |                     | FAM(N)       | VIC(ORF1ab) | FAM(N)             | VIC(ORF1ab) |
| Case 1*  | anal swab           | -            | 40          | 33.18              | 38.25       |
| Case 2   | nasopharyngeal swab | 31.19        | 34.75       |                    |             |
| Case 4   | nasopharyngeal swab | 32.79        | 36.14       |                    |             |
| Case 5   | nasopharyngeal swab | 32.98        | 37.83       |                    |             |
| Case 6   | nasopharyngeal swab | 32.35        | 36.74       |                    |             |
| Case 7*  | nasopharyngeal swab | <b>37.5</b>  | <b>40</b>   | 37.07              | 39.01       |
| Case 8   | anal swab           | 33.22        | 37.14       |                    |             |
| Case 9*  | anal swab           | 38.5         | 39.5        | 39                 | 40          |
| Case 10  | nasopharyngeal swab | 27.87        | 31.5        |                    |             |
| Case 11  | nasopharyngeal swab | 32.9         | 36.43       |                    |             |
| Case 12  | nasopharyngeal swab | 32.26        | 36.43       |                    |             |
| Case 13  | nasopharyngeal swab | 37           | 39.5        |                    |             |
| Case 14* | nasopharyngeal swab | <b>39</b>    | -           | 34.69              | 39.12       |
| Case 15  | anal swab           | 35.13        | -           |                    |             |
| Case 16  | nasopharyngeal swab | 36.5         | 39          |                    |             |
| Case 17  | nasopharyngeal swab | 35.5         | 38          |                    |             |
| Case 18* | nasopharyngeal swab | <b>37.92</b> | -           | 39                 | -           |
| Case 19  | anal swab           | 33           | 35          |                    |             |
| Case 20  | nasopharyngeal swab | 37.5         | 38.5        |                    |             |

-:  $\Delta Ct > 40$ , no Ct value shown.

\*: Ct values are weak positive ( $37 < \Delta Ct \leq 40$ ) for both N protein and ORF1ab, RT-PCR re-test was done next day, if Ct value  $\leq 40$ , a positive result would be reported.

Here we only get Ct value of 19 re-positive cases, the Ct value of Case 3 was missed.
